# Supplementary material
Source: Springer Nature journal article supplement (https://www.springermedizin.de/resource/supplementary/12967_2013_1631_MOESM1_ESM.pdf/9574532)

**Cohort 1 (100 µg)**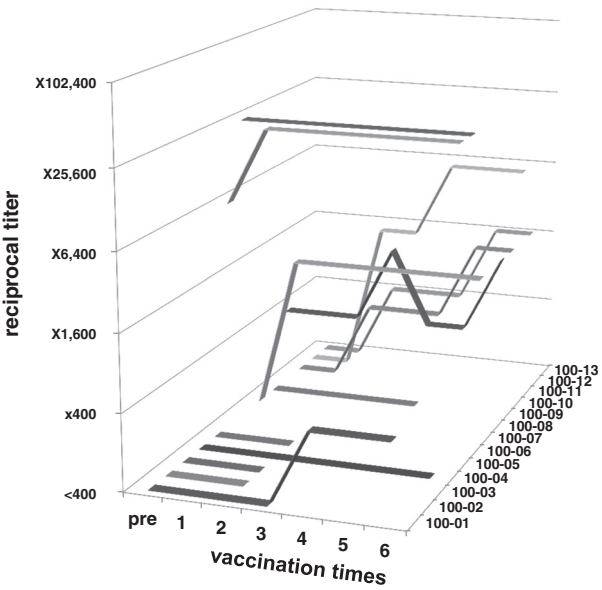**Cohort 2 (200 µg)**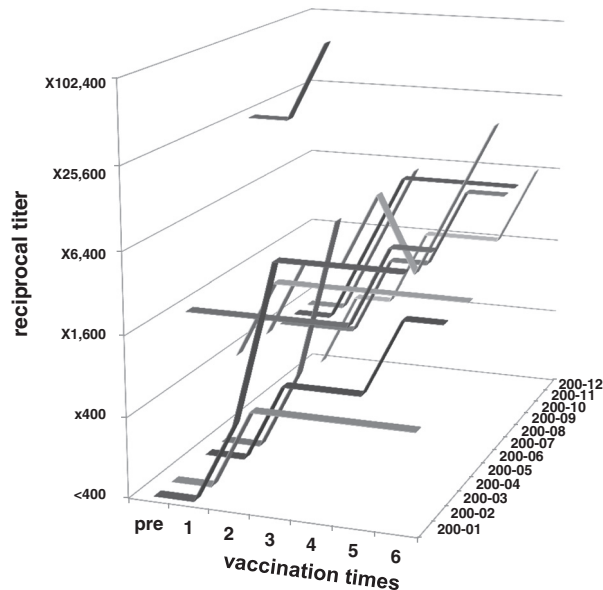

Supplement: MOESM1 [file 9574532]
